# Supplementary material
Source: MDPI journal article supplement (https://www.mdpi.com/2071-1050/15/15/11565)
Supplement: s1 [file s1]

### Supplmentary material

Table S1. Families, genera, species and their uses in Linares, Nuevo León, Mexico. In the first column, the collection number after the scientific name belongs to Eduardo Estrada.

| Scientific name                                               | Common name               | Uses (systems)                                                                  | Part used                                                                                                    | Method of use                                                                                                                                |
|---------------------------------------------------------------|---------------------------|---------------------------------------------------------------------------------|--------------------------------------------------------------------------------------------------------------|----------------------------------------------------------------------------------------------------------------------------------------------|
| ACANTHACEAE                                                   |                           |                                                                                 |                                                                                                              |                                                                                                                                              |
| <i>Ruellia nodiflora</i> (Engelm. & A.Gray) Urb., 25952       | Arnica                    | Ornamental                                                                      | Whole plant                                                                                                  | Planted in private gardens                                                                                                                   |
| AMARANTHACEAE                                                 |                           |                                                                                 |                                                                                                              |                                                                                                                                              |
| <i>Amaranthus palmeri</i> S. Watson, 25844                    | Bledo, quelite            | Medicinal (digestive system) ulcers<br>Forage                                   | Leaves, inflorescences, flowers<br>Whole plant                                                               | Boiled, drink the solution<br>Dry or fresh                                                                                                   |
| <i>Amaranthus spinosus</i> L., 25765                          | Bledo con espina, quelite | Medicinal (digestive system) ulcers<br>Forage<br>Compost                        | Leaves, inflorescences, flowers<br>Whole plant<br>Whole plant                                                | Boiled, drink the solution<br>Dry or fresh<br>Mixed with ripe fruit or fleshy stems                                                          |
| <i>Celosia argentea</i> L., 25950                             | Celosia                   | Ornamental<br>Religious beliefs, witchcraft                                     | Whole plant<br>Whole plants                                                                                  | Planted in private gardens<br>Component part of the bouquets                                                                                 |
| <i>Dysphania ambrosioides</i> (L.) Mosyakin & Clemants, 25846 | Epazote                   | Medicinal (digestive system), vermifuge<br>Food, condiment<br>Forage<br>Compost | Stems, inflorescences, (fresh or dry)<br>Stems, inflorescences, (fresh or dry)<br>Whole plant<br>Whole plant | Boiled, drink the solution<br>Boiled, added to the pot with beans to improve flavor<br>Dry or fresh<br>Mixed with ripe fruit or fleshy stems |
| <i>Gomphrena globosa</i> L., 25843                            | Jesusuito                 | Ornamental                                                                      | Whole plant                                                                                                  | Planted in private gardens                                                                                                                   |

| Scientific name                                                        | Common name       | Uses (systems)                                                                                                                                                                                     | Part used                                    | Method of use                                                                                                                                                          |
|------------------------------------------------------------------------|-------------------|----------------------------------------------------------------------------------------------------------------------------------------------------------------------------------------------------|----------------------------------------------|------------------------------------------------------------------------------------------------------------------------------------------------------------------------|
| ANACARDIACEAE                                                          |                   |                                                                                                                                                                                                    |                                              |                                                                                                                                                                        |
| <i>Rhus virens</i> Lindh. ex A. Gray, 25847                            | Lantrisco         | Ornamental<br>Forage                                                                                                                                                                               | Whole plant<br>Whole plant                   | Planted in private gardens<br>Dry or fresh                                                                                                                             |
| ANNONACEAE                                                             |                   |                                                                                                                                                                                                    |                                              |                                                                                                                                                                        |
| <i>Annona muricata</i> L., 25768                                       | Guanábana         | Food<br>Medicinal (digestive system), stomach ache<br>Medicinal (circulatory system), to improve blood circulation<br>Medicinal (skin and subcutaneous system), heal superficial wounds<br>Compost | Fruit<br>Leaves<br>Leaves<br>Leaves<br>Fruit | Raw<br>Boil, drink the solution<br>Boil, drink the solution<br>Use the solution as a poultice and apply it to superficial wounds<br>Mixed with grasses or fleshy stems |
| APIACEAE                                                               |                   |                                                                                                                                                                                                    |                                              |                                                                                                                                                                        |
| <i>Eryngium heterophyllum</i> Engelm., 25944                           | Hierba del sapo   | Medicinal (circulatory system), reduce cholesterol<br>Medicinal (genito-urinary system), eliminate infections                                                                                      | Roots and leaves<br>Roots and leaves         | Cut into pieces and boiled, drink the solution<br>Cut into pieces and boiled, drink the solution                                                                       |
| APOCYNACEAE                                                            |                   |                                                                                                                                                                                                    |                                              |                                                                                                                                                                        |
| <i>Cynanchum barbigerrum</i> (Scheele) Shinnery, 25943                 | Hierba del pájaro | Medicinal (genito-urinary system), clean urinary ducts<br>Religious beliefs, witchcraft                                                                                                            | Leaves<br>Whole plants                       | Boiled, drink the solution<br>Component part of the bouquets                                                                                                           |
| <i>Tabernaemontana divaricata</i> (L.) R.Br. ex Roem. & Schult., 26048 | Clavel            | Ornamental                                                                                                                                                                                         | Whole plant                                  | Cultivated in private gardens                                                                                                                                          |

| Scientific name                                   | Common name     | Uses (systems)       | Part used                   | Method of use                                      |
|---------------------------------------------------|-----------------|----------------------|-----------------------------|----------------------------------------------------|
|                                                   |                 | Religious witchcraft | beliefs, Leaves and flowers | Component part of the bouquets                     |
| ARACEAE                                           |                 |                      |                             |                                                    |
| <i>Anthurium</i> sp., 25770                       | Anturio         | Ornamental           | Whole plant                 | Cultivated in private gardens                      |
|                                                   |                 | Religious witchcraft | beliefs, Leaves             | Component part of the bouquets                     |
| <i>Arisaema macrospatum</i> Benth., 25957         | Tristón         | Ornamental           | Whole plant                 | Cultivated in private gardens                      |
| <i>Diffenbachia seguine</i> (Jacq.) Schott, 25958 | Mariana         | Ornamental           | Whole plant                 | Cultivated in private gardens                      |
|                                                   |                 | Religious witchcraft | beliefs, Whole plants       | Leaves and flowers. component part of the bouquets |
| <i>Monstera deliciosa</i> Liebm., 25959           | Monstera        | Ornamental           | Whole plant                 | Cultivated in private gardens                      |
|                                                   |                 | Religious witchcraft | beliefs, Leaves             | Component part of the bouquets                     |
| <i>Spathyphyllum wallisii</i> Regel, 25836        | Cuna de Moisés  | Ornamental           | Whole plant                 | Cultivated in private gardens                      |
|                                                   |                 | Religious witchcraft | beliefs, Inflorescence      | Component part of the bouquets                     |
| <i>Syngonium podophyllum</i> Schott, 25960        | Flecha          | Ornamental           | Whole plant                 | Cultivated in private gardens                      |
|                                                   |                 | Timber               | Wood                        | Dry                                                |
| ARECACEAE                                         |                 |                      |                             |                                                    |
| <i>Chamaedorea elegans</i> Mart., 25961           | Palma de jardín | Ornamental           | Whole plant                 | Cultivated in private gardens                      |
|                                                   |                 | Religious witchcraft | beliefs, Leaves             | Component part of the bouquets                     |
| ASPARAGACEAE                                      |                 |                      |                             |                                                    |

| Scientific name                                         | Common name      | Uses (systems)                                                                       | Part used                 | Method of use                                  |
|---------------------------------------------------------|------------------|--------------------------------------------------------------------------------------|---------------------------|------------------------------------------------|
| <i>Agave americana</i> L., 25851                        | Maguey           | Ornamental                                                                           | Whole plant               | Cultivated in private gardens                  |
|                                                         |                  | Forage                                                                               | Leaves and inflorescences | Dry or fresh                                   |
|                                                         |                  | Compost                                                                              | Whole plant               | Mixed with ripe fruit or fleshy stems          |
| <i>Beaucarnea recurvata</i> Lem., 25771                 | Pata de elefante | Ornamental                                                                           | Whole plant               | Cultivated in private gardens                  |
|                                                         |                  | Cosmetic                                                                             | Leaves                    | Pulp, raw, rub on the skin                     |
| <i>Yucca filifera</i> Chabaud, 25965                    | Palma china      | Ornamental                                                                           | Whole plant               | Cultivated in private gardens                  |
| <i>Yucca treculeana</i> Carrière, 25853                 | Pita             | Ornamental                                                                           | Whole plant               | Cultivated in private gardens                  |
|                                                         |                  | Compost                                                                              | Inflorescences            | Mixed with ripe fruit, grasses or fleshy stems |
| ASTERACEAE                                              |                  |                                                                                      |                           |                                                |
| <i>Achillea millefolium</i> L., 25854                   | Real de oro      | Ornamental                                                                           | Whole plant               | Cultivated in private gardens                  |
| <i>Artemisia ludoviciana</i> Nutt., 25773               | Estafiate        | Ornamental                                                                           | Whole plant               | Cultivated in private gardens                  |
|                                                         |                  | Medicinal (digestive system), stomach ache, diarrhea, eliminate intestinal parasites | Leaves                    | Boil and drink the solution                    |
|                                                         |                  | Medicinal (endocrine system), liver infections                                       | Leaves and stems          | Boil and drink the solution                    |
|                                                         |                  | Forage                                                                               | Whole plant               | Dry or fresh                                   |
|                                                         |                  | Religious beliefs, witchcraft                                                        | Leaves                    | Component part of the bouquets                 |
| <i>Baccharis salicifolia</i> (Ruiz y Pav.) Pers., 25774 | Jaras            | Ornamental                                                                           | Whole plant               | Cultivated in private gardens                  |

| Scientific name                                         | Common name       | Uses (systems)                                                                  | Part used                 | Method of use                                                                      |
|---------------------------------------------------------|-------------------|---------------------------------------------------------------------------------|---------------------------|------------------------------------------------------------------------------------|
| <i>Circium texanum</i> Buckley, 26051                   | Amapola del campo | Ornamental                                                                      | Whole plant               | Cultivated in private gardens                                                      |
| <i>Dahlia coccinea</i> Cav., 26042                      | Dalias            | Ornamental                                                                      | Whole plant               | Cultivated in private gardens                                                      |
|                                                         |                   | Religious beliefs, witchcraft                                                   | Leaves and inflorescences | Component part of the bouquets                                                     |
| <i>Flourensia cernua</i> DC., 25938                     | Hojasé            | Medicinal (respiratory system), clean bronchi                                   | Leaves                    | Boiled, drink the solution                                                         |
| <i>Pseudognaphalium viscosum</i> (Kunth) Anderb., 25856 | Gordolobo         | Medicinal (respiratory system), clean bronchi, eliminte cough, disinfect throat | Leaves and inflorescences | Boiled, drink the solution                                                         |
| <i>Helianthus annuus</i> L., 25775                      | Girasol           | Ornamental                                                                      | Whole plant               | Cultivated in private gardens                                                      |
|                                                         |                   | Forage                                                                          | Whole plant               | Dre, raw                                                                           |
|                                                         |                   | Religious and beliefs                                                           | Leaves and inflorescences | Flower bouquets at funerals                                                        |
|                                                         |                   | Food                                                                            | Seeds                     | Raw                                                                                |
|                                                         |                   | Forage                                                                          | Seeds                     | Dried, to feed captive birds                                                       |
|                                                         |                   | Religious beliefs, witchcraft                                                   | Inflorescences            | Component part of the bouquets                                                     |
|                                                         |                   | Compost                                                                         | Whole plant               | Mixed with ripe fruit, grasses or fleshy stems                                     |
| <i>Parthenium hysterophorus</i> L., 25857               | Amargoso          | Drive away vermin from the house for its heartbreaking smell                    | Whole plant               | In pots and they are placed at the entrance, next to the doors or near the windows |
| <i>Tagetes erecta</i> L., 25777                         | Cempasuchil       | Ornamental                                                                      | Whole plant               | Planted in private gardens                                                         |
|                                                         |                   | Ornamental                                                                      | Whole plant               | Cultivated in private gardens                                                      |

| Scientific name                              | Common name | Uses (systems)                                                                                         | Part used      | Method of use                                                                |
|----------------------------------------------|-------------|--------------------------------------------------------------------------------------------------------|----------------|------------------------------------------------------------------------------|
| <i>Tagetes lucida</i> Cav., 25936            | Yerbanis    | Religious and beliefs                                                                                  | Whole plant    | Placed on the graves of the dead and prayed for                              |
|                                              |             | Religious beliefs, witchcraft                                                                          | Whole plants   | Component part of the bouquets, in rites and prayers together with incense   |
|                                              |             | Medicinal (digestive system), pain in general, constipation, eliminate flatulence, reduce inflammation | Whole plants   | Dried, cut into pieces and boiled, drink the solution                        |
|                                              |             | Medicinal (respiratory system), eliminate cough                                                        | Whole plants   | Dried, cut into pieces and boiled, drink the solution                        |
| <i>Verbesina crocata</i> (Cav.) Less., 25832 | Capitanjea  | Ornamental                                                                                             | Whole plant    | Planted in private gardens                                                   |
|                                              |             | Forage                                                                                                 | Whole plant    | Dry or fresh                                                                 |
|                                              |             | Medicinal (digestive system), stomach ache, diarrhea, gastritis                                        | Whole plants   | Dried, cut into pieces and boiled, drink the solution                        |
|                                              |             | Medicinal (genito-urinary system), diuretic, vaginal infections                                        | Whole plants   | Dried, cut into pieces and boiled, drink the solution, and apply as poultice |
|                                              |             | Medicinal (skin and subcutaneous system), skin infections                                              | Whole plants   | Dried, cut into pieces and boiled, apply as poultice                         |
| <i>Zinnia elegans</i> L., 25858              | Cartulina   | Ornamental                                                                                             | Whole plant    | Cultivated in private gardens                                                |
|                                              |             | Religious beliefs, witchcraft                                                                          | Inflorescences | Component part of the bouquets                                               |
| <i>Achillea millefolium</i> L., 25935        | Real de oro | Ornamental                                                                                             | Whole plant    | Cultivated in private gardens                                                |

| Scientific name                                | Common name          | Uses (systems)                                                                  | Part used                 | Method of use                                        |
|------------------------------------------------|----------------------|---------------------------------------------------------------------------------|---------------------------|------------------------------------------------------|
|                                                |                      | Religious beliefs, witchcraft                                                   | Leaves and inflorescences | Component part of the bouquets                       |
| BEGONIACEAE                                    |                      |                                                                                 |                           |                                                      |
| <i>Begonia gracilis</i> Kunth, 25970           | Begonia              | Ornamental                                                                      | Whole plant               | Cultivated in private gardens                        |
|                                                |                      | Religious beliefs, witchcraft                                                   | leaves                    | Component part of the bouquets                       |
| BIGNONIACEAE                                   |                      |                                                                                 |                           |                                                      |
| <i>Tecoma stans</i> (L.) Juss. ex Kunth, 25959 | San Pedro, tronadora | Ornamental                                                                      | Whole plant               | Cultivated in private gardens                        |
|                                                |                      | Medicinal (respiratory system), cold                                            | Flowers                   | Boil, drink the solution                             |
|                                                |                      | Medicinal (endocrine system), diabetes                                          | Flowers, wood             | Boil, drink the solution                             |
|                                                |                      | Religious beliefs, witchcraft                                                   | Leaves and inflorescences | Component part of the bouquets                       |
| BORAGINACEAE                                   |                      |                                                                                 |                           |                                                      |
| <i>Cordia boissieri</i> A. DC., 25829          | Anacahuita           | Ornamental                                                                      | Whole plant               | Cultivated in private gardens                        |
|                                                |                      | Medicinal (respiratory system), coughing, lung infections and removal of phlegm | Fruits and leaves         | Boiled, drink the solution                           |
|                                                |                      | Forage                                                                          | Leaves                    | Dry or fresh                                         |
|                                                |                      | Compost                                                                         | Leaves and branches       | Mixed with ripe fruit or fleshy stems                |
| <i>Ehretia anacua</i> Terán & Berland, 25971   | Anacua               | Ornamental                                                                      | Whole plant               | Cultivated in public, private gardens, and sidewalks |
|                                                |                      | Timber                                                                          | Wood                      | Dry                                                  |

| Scientific name                                          | Common name | Uses (systems)                              | Part used         | Method of use                                  |
|----------------------------------------------------------|-------------|---------------------------------------------|-------------------|------------------------------------------------|
|                                                          |             | Compost                                     | Leaves and fruits | Mixed with ripe fruit, grasses or fleshy stems |
| BURSERACEAE                                              |             |                                             |                   |                                                |
| <i>Bursera graveolens</i> (Kunth) Triana & Planch, 25932 | Palo santo  | Ornamental                                  | Whole plant       | Cultivated in private gardens                  |
|                                                          |             | Medicinal (digestive system), antidiarrheal | Bark and leaves   | Boil, drink the solution                       |
|                                                          |             | Medicinal (genito-urinary system), diuretic | Bark and leaves   | Boil, drink the solution                       |
|                                                          |             | Religion, aromatic smoke, trance            | Branches          | Burn                                           |
| CACTACEAE                                                |             |                                             |                   |                                                |
| <i>Acanthocereus tetragonus</i> (L.) Hummelinck, 25861   | Órgano      | Ornamental                                  | Whole plant       | Cultivated in private gardens                  |
|                                                          |             | Compost                                     | Whole plant       | Mixed with grasses or fleshy stems             |
|                                                          |             | Forage                                      | Whole plant       | Raw, cut into pieces                           |
|                                                          |             | Compost                                     | Whole plant       | Mixed with grasses or fleshy stems             |
| <i>Ancistrocactus megarhizus</i> Britton & Rose, 25824   | Chilitos    | Ornamental                                  | Whole plant       | Cultivated in private gardens                  |
|                                                          |             | Compost                                     | Whole plant       | Mixed with grasses or fleshy stems             |
| <i>Cylindropuntia imbricata</i> (Haw.) F.K. Knuth, 25931 | Coyonoxtle  | Ornamental                                  | Whole plant       | Cultivated in private gardens                  |
|                                                          |             | Compost                                     | Whole plant       | Mixed with grasses or fleshy stems             |
| <i>Cylindropuntia leptocaulis</i> (DC.) F.M.Knuth, 25973 | Tasajillo   | Ornamental                                  | Whole plant       | Cultivated in private gardens                  |



| Scientific name                                                     | Common name     | Uses (systems)                                              | Part used   | Method of use                                                                                                     |
|---------------------------------------------------------------------|-----------------|-------------------------------------------------------------|-------------|-------------------------------------------------------------------------------------------------------------------|
| <i>Echinocereus pentelopophus</i> (DC.) Lem., 25825                 | Chilitos        | Ornamental                                                  | Whole plant | Cultivated in private gardens                                                                                     |
| <i>Echinocereus poselgeri</i> Lem., 26039, N                        | Zacasil         | Ornamental                                                  | Whole plant | Cultivated in private gardens                                                                                     |
| <i>Echinocereus texensis</i> Jacobi, 26040                          | Manca caballo   | Ornamental                                                  | Whole plant | Cultivated in private gardens                                                                                     |
| <i>Ferocactus pilosus</i> (Galeoti ex Salm-Dyck) Werderm., 26052    | Biznaga roja    | Ornamental                                                  | Whole plant | Cultivated in private gardens                                                                                     |
|                                                                     |                 | Compost                                                     | Whole plant | Mixed with grasses or fleshy stems                                                                                |
|                                                                     |                 | Forage                                                      | Whole plant | Dry or fresh                                                                                                      |
|                                                                     |                 | Ornamental                                                  | Whole plant | Cultivated in private gardens                                                                                     |
|                                                                     |                 | Medicinal (digestive system), flatulence's and constipation | Fruit       | Raw                                                                                                               |
| <i>Hylocereus undatus</i> (Haw.) Britton & Rose, 25862              | Fruta de dragón | Compost                                                     | Whole plant | Mixed with grasses or fleshy stems                                                                                |
|                                                                     |                 | Ornamental                                                  | Whole plant | Cultivated in private gardens                                                                                     |
|                                                                     |                 | Medicinal (muscular-skeletal system), muscle and joint pain | Whole plant | Raw, in alcohol and mixed with marijuana inflorescences and leaves, the solution use as poultice in the sore part |
| <i>Lophophora williamsii</i> (Lem. ex Salm-Dyck) J.M. Coult., 25823 | Peyote          | Ornamental                                                  | Whole plant | Planted in private gardens                                                                                        |
|                                                                     |                 | Ornamental                                                  | Whole plant | Cultivated in private gardens                                                                                     |
| <i>Mammillaria germinispina</i> Haw., 25779                         | Chilitos        | Ornamental                                                  | Whole plant | Cultivated in private gardens                                                                                     |
| <i>Mammillaria elongata</i> DC., 25927                              | Chilitos        | Ornamental                                                  | Whole plant | Cultivated in private gardens                                                                                     |

| Scientific name                                                                                                                   | Common name                 | Uses (systems) | Part used   | Method of use                      |
|-----------------------------------------------------------------------------------------------------------------------------------|-----------------------------|----------------|-------------|------------------------------------|
| <i>Mammillaria gracilis</i> Pfeiff., 25928                                                                                        | Chilitos                    | Ornamental     | Whole plant | Cultivated in private gardens      |
| <i>Mammillaria magnimamma</i> Haw., 25780                                                                                         | Chilitos                    | Ornamental     | Whole plant | Cultivated in private gardens      |
| <i>Mammillaria parkinsonii</i> Ehrenb., 25929                                                                                     | Chilitos                    | Ornamental     | Whole plant | Cultivated in private gardens      |
| <i>Mammillaria picta</i> Meinsh., 25930                                                                                           | Chilitos                    | Ornamental     | Whole plant | Cultivated in private gardens      |
| <i>Mammillaria sphaerica</i> A. Dietr., 25781                                                                                     | Chilitos                    | Ornamental     | Whole plant | Cultivated in private gardens      |
| <i>Marginatocereus marginatus</i> (DC.) Backeb., 25974                                                                            | Candelabro, órgano          | Ornamental     | Whole plant | Cultivated in private gardens      |
|                                                                                                                                   |                             | Forage         | Whole plant | Raw, cut into pieces, scorched     |
|                                                                                                                                   |                             | Compost        | Whole plant | Mixed with grasses or fleshy stems |
| <i>Opuntia engelmanni</i> Salm-Dyck ex Engelm., 25863                                                                             | Nopal espinas               | con            |             |                                    |
|                                                                                                                                   |                             | Forage         | Whole plant | Raw, cut into pieces               |
|                                                                                                                                   |                             | Ornamental     | Whole plant | Planted in private gardens         |
| <i>Opuntia ficus-indica</i> (L.) Mill., 25925                                                                                     | Nopal espinas               | sin            | Whole plant | Mixed with grasses or fleshy stems |
|                                                                                                                                   |                             | Ornamental     | Whole plant | Cultivated in private gardens      |
|                                                                                                                                   |                             | Forage         | Whole plant | Raw, cut into pieces               |
| <i>Opuntia microdasys</i> (Lehm.) Pfeiff., 25926<br><i>Stenocereus huastecorum</i> Alvarado-Sizzo, Arreola-Nava y Terrazas, 25975 | Nopal cegador<br>Candelabro | sin            | Whole plant | Mixed with grasses or fleshy stems |
|                                                                                                                                   |                             | Ornamental     | Whole plant | Cultivated in private gardens      |
|                                                                                                                                   |                             | Compost        | Whole plant | Mixed with grasses or fleshy stems |

| Scientific name                                    | Common name   | Uses (systems)                                             | Part used           | Method of use                            |
|----------------------------------------------------|---------------|------------------------------------------------------------|---------------------|------------------------------------------|
| <b>CANNABACEAE</b>                                 |               |                                                            |                     |                                          |
| <i>Celtis pallida</i> Torr., 26053                 | Granjeno      | Ornamental                                                 | Whole plant         | Cultivated in private and public gardens |
|                                                    |               | Food                                                       | Fruits              | Raw                                      |
| <b>CARICACEAE</b>                                  |               |                                                            |                     |                                          |
| <i>Carica papaya</i> L., 25864                     | Papaya        | Ornamental                                                 | Whole plant         | Cultivated in private gardens            |
|                                                    |               | Food                                                       | Fruit               | Raw                                      |
|                                                    |               | Medicinal (digestive system), constipation, vermifuge      | Fruit pulp and seed | Raw, seeds milled and dink               |
|                                                    |               | Compost                                                    | Fruit pulp and seed | Mixed with plants to make compost        |
| <b>COMMELINACEAE</b>                               |               |                                                            |                     |                                          |
| <i>Commelina coelestis</i> Willd., 25782           | Flor azul     | Ornamental                                                 | Whole plant         | Cultivated in private gardens            |
| <i>Tradescantia pallida</i> (Rose) D.R.Hunt, 25977 | Magüey morado | Ornamental                                                 | Whole plant         | Cultivated in private gardens            |
| <i>Tradescantia zebrina</i> Bosse, 25978           | Zacate verde  | Ornamental                                                 | Whole plant         | Cultivated in private gardens            |
| <b>COSTACEAE</b>                                   |               |                                                            |                     |                                          |
| <i>Costus pictus</i> D. Don, 25924                 | Lipana        | Ornamental                                                 | Whole plant         | Cultivated in private gardens            |
|                                                    |               | Medicinal (genito-urinary system), diuretic, kidney stones | Stems and leaves    | Boil, drink the solution                 |
| <b>CRASSULACEAE</b>                                |               |                                                            |                     |                                          |
| <i>Echeveria strictiflora</i> A. Gray, 25821       | Siempreviva   | Ornamental                                                 | Whole plant         | Cultivated in private gardens            |

| Scientific name                              | Common name       | Uses (systems)                                                                                      | Part used                                     | Method of use                                                                 |
|----------------------------------------------|-------------------|-----------------------------------------------------------------------------------------------------|-----------------------------------------------|-------------------------------------------------------------------------------|
| <i>Sedum palmeri</i> S. Watson, 25923        | Siempreviva       | Ornamental                                                                                          | Whole plant                                   | Cultivated in private gardens                                                 |
| CUCURBITACEAE                                |                   |                                                                                                     |                                               |                                                                               |
| <i>Cucurbita pepo</i> L., 25980              | Calabaza          | Food<br>Compost<br>Ornamental<br>Forage                                                             | Fruit<br>Fruits<br>Whole plant<br>Whole plant | Raw<br>Raw, mixed with grasses<br>Planted in private gardens<br>Dry or fresh  |
| CUPRESSACEAE                                 |                   |                                                                                                     |                                               |                                                                               |
| <i>Taxodium huegelii</i> C. Lawson, 25867    | Sabino            | Ornamental<br><br>Timber                                                                            | Whole plant<br><br>Trunks and branches        | Cultivated in private gardens<br>Dry                                          |
| CYCADACEAE                                   |                   |                                                                                                     |                                               |                                                                               |
| <i>Cycas revoluta</i> Thunb., 25981          | Cyca              | Ornamental                                                                                          | Whole plant                                   | Cultivated in private gardens                                                 |
| EQUISETACEAE                                 |                   |                                                                                                     |                                               |                                                                               |
| <i>Equisetum laevigatum</i> A. Braun, 25820  | Cola de caballo   | Ornamental<br><br>Medicinal (genito-urinary system), urinary infections and kidney stones<br>Forage | Whole plant<br><br>Stems<br><br>Whole plant   | Cultivated in private gardens<br>Boil, drink the solution<br><br>Dry or fresh |
| EUPHORBIACEAE                                |                   |                                                                                                     |                                               |                                                                               |
| <i>Acalypha lindheimeri</i> Müll.Arg., 25921 | Hierba del cáncer | Medicinal (edocrine system), cure cancer                                                            | Stems, leaves and inflorescences              | Boil, drink the solution                                                      |
| <i>Cnidoscolus chayamansa</i> McVaugh, 25869 | Pistache          | Ornamental<br><br>Medicinal (circulatory and digestive systems), improve blood                      | Whole plant<br><br>Leaves                     | Cultivated in private gardens<br>Raw, blended in water, drink the juice       |

| Scientific name                                        | Common name            | Uses (systems)                                                                                                                                               | Part used                                    | Method of use                                                                                                                     |
|--------------------------------------------------------|------------------------|--------------------------------------------------------------------------------------------------------------------------------------------------------------|----------------------------------------------|-----------------------------------------------------------------------------------------------------------------------------------|
|                                                        |                        | circulation, improve digestion<br>Forage<br>Compost                                                                                                          | Whole plant<br>Whole plant                   | Dry or fresh<br>Mixed with ripe fruits, grasses or fleshy stems                                                                   |
| <i>Croton suaveolens</i> Torr., 25819                  | Salvia                 | Medicinal (circulatory system), improve blood circulation, thins the blood                                                                                   | Leaves and parts of trunk and branches       | Put in water, and left to rest for two or three days, drink the solution as water for daily use.                                  |
| <i>Euphorbia prostrata</i> Aiton, 25984                | Golondrina             | Medicinal (skin and subcutaneous system), skin infections and superficial wounds                                                                             | Sap (milky liquid)                           | Directly apply the liquid on the affected part                                                                                    |
| <i>Euphorbia pulcherrima</i> Willd. ex Klotzsch, 25870 | Nochebuena             | Ornamental                                                                                                                                                   | Whole plant                                  | Cultivated in private gardens                                                                                                     |
| <i>Jatropha dioica</i> Sessé, 26036                    | Grado, sangre de drago | Medicinal (skin and subcutaneous system), hair growth<br>Medicinal (digestive system), harden dentures, prevent teeth from falling out<br>Cosmetic, hair dye | Root<br>Roots and stems<br>Root and branches | Milled, mix with water and apply directly to the head<br>Chew them raw, do not swallow the sap<br>Boiled, wash hair with solution |
| FABACEAE                                               |                        |                                                                                                                                                              |                                              |                                                                                                                                   |
| <i>Bauhinia purpurea</i> L., 26035                     | Pata de vaca           | Ornamental                                                                                                                                                   | Whole plant                                  | Cultivated in private gardens                                                                                                     |
| <i>Caesalpinia mexicana</i> A.Gray, 25986              | Hierba del potro       | Ornamental                                                                                                                                                   | Whole plant                                  | Cultivated in private gardens                                                                                                     |
| <i>Caesalpinia gilliesii</i> (Hook.) D. Dietr. 25918   | Tabachín               | Ornamental                                                                                                                                                   | Whole plant                                  | Cultivated in private gardens                                                                                                     |

| Scientific name                                               | Common name | Uses (systems)                                        | Part used                                | Method of use                                                                         |
|---------------------------------------------------------------|-------------|-------------------------------------------------------|------------------------------------------|---------------------------------------------------------------------------------------|
| <i>Ebenopsis ebano</i> (Berland.) Barneby & J.W.Grimes, 25873 | Ébano       | Food                                                  | Seeds (immature)                         | Raw                                                                                   |
|                                                               |             | Forage                                                | Whole plant                              | Dry or fresh                                                                          |
|                                                               |             | Ornamental                                            | Whole plant                              | Cultivated in private gardens                                                         |
|                                                               |             | Fuel (charcoal)                                       | Wood                                     | Dry                                                                                   |
|                                                               |             | Timber                                                | Wood                                     | Dry                                                                                   |
|                                                               |             | Cosmetic, like perfume                                | Flowers                                  | Boiled, mixed with alcohol                                                            |
| <i>Eysenhardtia texana</i> Scheele, 25874                     | Vara dulce  | Forage                                                | Leaves and fruits                        | Raw                                                                                   |
|                                                               |             | Medicinal (genito-urinary system), urinary infections | Leaves and pieces of trunks and branches | Introduce in water, let stand for 3 days (until it turns blue) and drink the solution |
|                                                               |             | Ornamental                                            | Whole plant                              | Planted in private gardens                                                            |
|                                                               |             | Compost                                               | Leaves and fruits                        | Mixed with grasses or fleshy stems                                                    |
| <i>Havardia pallens</i> (Benth.) Britton & Rose, 25917        | Tenaza      | Forage                                                | Leaves and fruits                        | Raw                                                                                   |
|                                                               |             | Timber                                                | Wood                                     | Dry                                                                                   |
|                                                               |             | Ornamental                                            | Whole plant                              | Cultivated in private gardens                                                         |
|                                                               |             | Fuel                                                  | Wood                                     | Dry                                                                                   |
| <i>Leucaena leucocephala</i> (Lam.) de Wit, 25818             | Dormilón    | Compost                                               | Leaves and fruits                        | Mixed with grasses or fleshy stems                                                    |
|                                                               |             |                                                       |                                          | Boiled                                                                                |
|                                                               |             | Ornamental                                            | Whole plant                              | Cultivated in private gardens                                                         |
|                                                               | Tepehuaje   | Forage                                                | Whole plant                              | Dry or fresh                                                                          |
|                                                               |             | Food                                                  | Fruits (immature)                        | Boiled                                                                                |
|                                                               |             |                                                       |                                          |                                                                                       |

| Scientific name                                                         | Common name   | Uses (systems)                                        | Part used           | Method of use                            |
|-------------------------------------------------------------------------|---------------|-------------------------------------------------------|---------------------|------------------------------------------|
| <i>Leucaena pulverulenta</i> (Schltdl.) Benth., 25784                   |               | Ornamental                                            | Whole plant         | Cultivated in private gardens            |
| <i>Mimosa malacophylla</i> A. Gray, 25916                               | Charrasquilla | Medicinal (genito-urinary system), urinary infections | Leaves and branches | Boil, drink the solution                 |
| <i>Pachyrhizus erosus</i> (L.) Urb., 25987                              | Jicama        | Food                                                  | Root                | Raw, alone or in salads                  |
|                                                                         |               | Ornamental                                            | Whole plant         | Cultivated in private gardens            |
|                                                                         |               | Compost                                               | Leaves and fruits   | Mixed with grasses or fleshy stems       |
| <i>Parkinsonia taxana</i> ssp. <i>macra</i> (I.M. Johnst.) Isley, 25988 | Palo verde    | Ornamental                                            | Whole plant         | Cultivated in private and public gardens |
|                                                                         |               | Fuel                                                  | Wood                | Dry                                      |
|                                                                         |               | Timber                                                | Wood                | Dry                                      |
| <i>Parkinsonia aculeata</i> L., 25915                                   | Retama        | Ornamental                                            | Whole plant         | Cultivated in private gardens            |
| <i>Phaseolus vulgaris</i> L., 25817                                     | Frijol        | Food                                                  | Seeds               | Cooked                                   |
|                                                                         |               | Forage                                                | Whole plant         | Dry or fresh                             |
|                                                                         |               | Compost                                               | Leaves and fruits   | Mixed with grasses or fleshy stems       |
| <i>Prosopis laevigata</i> (Willd.) M.C. Johnst., 25989                  | Mezquite      | Ornamental                                            | Whole plant         | Cultivated in private and public gardens |
|                                                                         |               | Forage                                                | Leaves and fruits   | Raw                                      |
|                                                                         |               | Fuel                                                  | Trunks and branches | Dry                                      |
|                                                                         |               | Timber                                                | Wood                | Dry                                      |
|                                                                         |               | Medicinal (digestive system), dysentery               | Fruits              | Boiled, drink the solution               |
| <i>Vachellia farnesiana</i> (L.) Wight & Arn., 25816                    | Huizache      | Ornamental                                            | Whole plant         | Cultivated in private and public gardens |
|                                                                         |               | Forage                                                | Leaves and fruits   | Raw                                      |
|                                                                         |               | Timber                                                | Wood                | Dry                                      |

| Scientific name                                                | Common name | Uses (systems)                | Part used                     | Method of use                                 |
|----------------------------------------------------------------|-------------|-------------------------------|-------------------------------|-----------------------------------------------|
|                                                                |             | Fuel                          | Wood                          | Dry                                           |
|                                                                |             | Compost                       | Leaves and fruits             | Mixed with grasses or fleshy stems            |
| <i>Vachellia rigidula</i> (Benth.) Seigler & Ebinger, 25876, N | Gavia       | Ornamental                    | Whole plant                   | Cultivated in private gardens                 |
| FAGACEAE                                                       |             |                               |                               |                                               |
| <i>Quercus laeta</i> Liebm., 25914                             | Encino      | Ornamental                    | Whole plant                   | Cultivated in private and public gardens      |
|                                                                |             | Fuel                          | Trunks and branches           | Dry                                           |
|                                                                |             | Timber                        | Wood                          | Dry                                           |
|                                                                |             | Forage                        | Fruits                        | Dry or fresh                                  |
| <i>Quercus mexicana</i> Bonpl., 25990                          | Encino      | Ornamental                    | Whole plant                   | Cultivated in private and public gardens      |
|                                                                |             | Fuel                          | Trunks and branches           | Dry                                           |
|                                                                |             | Timber                        | Wood                          | Dry                                           |
| <i>Quercus polymorpha</i> Schltdl. & Cham., 25815, N           | Encino      | Ornamental                    | Whole plant                   | Cultivated in private and public gardens      |
|                                                                |             | Fuel                          | Trunks and branches           | Dry                                           |
|                                                                |             | Timber                        | Wood                          | Dry                                           |
|                                                                |             | Forage                        | Seeds, to feed pigs (mainly)  | Raw                                           |
| <i>Quercus virginiana</i> Mill., 25877                         | Encino      | Construction                  | Trunks and branches           | Dry                                           |
|                                                                |             | Ornamental                    | Whole plant                   | Cultivated in private and public gardens      |
|                                                                |             | Fuel                          | Trunks and branches           | Dry                                           |
| JUGLANDACEAE                                                   |             |                               |                               |                                               |
| <i>Carya illinoensis</i> (Wangenh.) K.Koch, 26055              | Nogal       | Ornamental                    | Whole plant                   | Cultivated in private gardens                 |
|                                                                |             | Fuel                          | Trunk and branches            | Dry                                           |
|                                                                |             | Medicinal (digestive system), | Seeds (raw) and bark (boiled) | Raw seeds and boiled bark, drink the solution |



| Scientific name                                                              | Common name         | Uses (systems)                                                  | Part used                                          | Method of use                                                                     |
|------------------------------------------------------------------------------|---------------------|-----------------------------------------------------------------|----------------------------------------------------|-----------------------------------------------------------------------------------|
|                                                                              |                     | infections (seeds),<br>antibacterial (bark)                     |                                                    |                                                                                   |
| <i>Carya myristiciformis</i> (F. Michx.) Nutt., 25878                        | Nogal               | Timber<br>Ornamental                                            | Wood<br>Whole plant                                | Dry<br>Cultivated in private gardens                                              |
|                                                                              |                     | Fuel<br>Timber<br>Compost                                       | Trunk and branches<br>Wood<br>Leaves and fruits    | Dry<br>Dry<br>Mixed with grasses or fleshy stems                                  |
| LAMIACEAE                                                                    |                     |                                                                 |                                                    |                                                                                   |
| <i>Hedeoma drummondii</i> Benth., 25787                                      | Poleo               | Medicinal (digestive system),<br>digestion                      | Leaves, inflorescences and branches                | Boiled, drikn the solution                                                        |
| <i>Hedeoma palmeri</i> Hemsl., 25991                                         | Poleo               | Medicinal (digestive system),<br>digestion                      | Leaves, inflorescences and branches                | Boiled, drink the solution                                                        |
| <i>Monarda citriodora</i> var. <i>austromona</i> (Epling) B.L. Turner, 25879 | Betónica            | Medicinal (digestive system), stomach ache<br>Ornamental        | Leaves, inflorescences and branches<br>Whole plant | Boiled, drink the solution<br>Planted in private gardens                          |
| <i>Teucrium cubense</i> Jacq., 25880                                         | Verbena             | Medicinal (digestive system), pains                             | Leaves, inflorescences and branches                | Boiled, drink the solution                                                        |
| LAURACEAE                                                                    |                     |                                                                 |                                                    |                                                                                   |
| <i>Litsea glaucescens</i> Kunth, 25910                                       | Laurel de la sierra | Food (condiment)<br>Ornamental<br>Religious beliefs, witchcraft | Leaves<br>Whole plant<br>Leaves                    | Boiled, in broths<br>Planted in private gardens<br>Component part of the bouquets |
| <i>Persea americana</i> Mill., 25994                                         | Aguacate            | Ornamental<br><br>Food                                          | Whole plant<br><br>Fruit                           | Cultivated in private gardens<br>Raw                                              |

| Scientific name                                      | Common name   | Uses (systems)                                                                                      | Part used                  | Method of use                                                                           |
|------------------------------------------------------|---------------|-----------------------------------------------------------------------------------------------------|----------------------------|-----------------------------------------------------------------------------------------|
|                                                      |               | Cosmetics                                                                                           | Fruits and stone (seed)    | Fruit pulp and stone (milled), mixed, apply directly on the face                        |
|                                                      |               | Medicinal (digestive system), intestinal inflammations, antidiarrheal, intestinal parasites (stone) | Leaves                     | Boil, drink the solution, for parasites mix it with ground (stone) bone in the solution |
|                                                      |               | Medicinal (circulatory system), protect the heart                                                   | Whole plants               | Boil, drink the solution                                                                |
|                                                      |               | Compost                                                                                             | Leaves and fruits          | Mixed with grasses or fleshy stems                                                      |
| LOMARIOPSIDACEAE                                     |               |                                                                                                     |                            |                                                                                         |
| <i>Nephrolepis axaltata</i> (L.) Schott, 26028       | Helecho       | Ornamental                                                                                          | Whole plant                | Cultivated in private gardens                                                           |
| MAGNOLIACEAE                                         |               |                                                                                                     |                            |                                                                                         |
| <i>Magnolia grandiflora</i> L., 25882                | Magnolia      | Ornamental                                                                                          | Whole plant                | Cultivated in private gardens                                                           |
| MALPIGHIACEAE                                        |               |                                                                                                     |                            |                                                                                         |
| <i>Galphimia angustifolia</i> Benth., 25909          | Calderona     | Medicinal (nervous system), relaxing                                                                | Leaves, branches           | Boiled, drink the solution                                                              |
| MALVACEAE                                            |               |                                                                                                     |                            |                                                                                         |
| <i>Ceiba pentandra</i> (L.) Gaertn., 25996           | Ceiba         | Ornamental                                                                                          | Whole plant                | Cultivated in private gardens                                                           |
| <i>Sida rhombifolia</i> L., 26027                    | Flor amarilla | Ornamental                                                                                          | Whole plant                | Cultivated in private gardens                                                           |
| <i>Hibiscus poeppigii</i> (Spreng.) Garcke, 26057, N | Tulipanes     | Forage<br>Ornamental                                                                                | Whole plant<br>Whole plant | Dry or fresh<br>Cultivated in private gardens                                           |

| Scientific name                           | Common name  | Uses (systems)                                                     | Part used         | Method of use                                             |
|-------------------------------------------|--------------|--------------------------------------------------------------------|-------------------|-----------------------------------------------------------|
| <i>Tilia mexicana</i> Schltld., 26069     | Tilo         | Medicinal (nervous system), relaxing                               | Leaves            | Boiled, drink the solution                                |
| MORACEAE                                  |              |                                                                    |                   |                                                           |
| <i>Morus celtidifolia</i> Kunth, 25999    | Mora         | Ornamental                                                         | Whole plant       | Cultivated in private and public gardens                  |
| MYRTACEAE                                 |              |                                                                    |                   |                                                           |
| <i>Psidium guajava</i> L., 25809          | Guayaba      | Food                                                               | Fruit             | Raw                                                       |
|                                           |              | Medicinal (digestive system), diarrhea, stomach ache               | Fruits and leaves | The fruits raw, the leaves boiled to control stomach ache |
|                                           |              | Medicinal (nervous system), relaxing                               | Leaves            | Boiled, drink the solution                                |
|                                           |              | Medicinal (circulatory system), heal the heart, reduce cholesterol | Fruit and leaves  | Boiled, drink the solution and eat the pulp and seeds     |
|                                           |              | Medicinal (genito-urinary system), menstrual cramps                | Leaves            | Boiled, drink the solution                                |
|                                           |              | Medicinal (immune system), improves immunity against diseases      | Leaves and fruits | Boiled leaves, drink the solution, eat raw fruits         |
|                                           |              | Ornamental                                                         | Whole plant       | Planted in private gardens                                |
| NYCTAGINACEAE                             |              |                                                                    |                   |                                                           |
| <i>Boerhavia coccinea</i> Mill., 25885    | Aretes rosas | Ornamental                                                         | Whole plant       | Cultivated in private gardens                             |
| <i>Bougainvillea glabra</i> Choisy, 25905 | Bugambilia   | Ornamental                                                         | Whole plant       | Cultivated in private gardens                             |
|                                           |              | Medicinal (respiratory system), cough                              | Bracts            | Boiled, drink the solution                                |

[illegible]

| Scientific name                                        | Common name     | Uses (systems)                          | Part used     | Method of use                                                                                                  |
|--------------------------------------------------------|-----------------|-----------------------------------------|---------------|----------------------------------------------------------------------------------------------------------------|
| <i>Russelia equisetiformis</i> Schltdl. & Cham., 26020 | Trompetilla     | Ornamental                              | Whole plant   | Cultivated in private gardens                                                                                  |
| PLUMBAGINACEAE                                         |                 |                                         |               |                                                                                                                |
| <i>Plumbago scandens</i> L., 25790                     | Jazmin del cabo | Ornamental                              | Whole plant   | Cultivated in private gardens                                                                                  |
|                                                        |                 | Forage                                  | Whole plant   | Dry or fresh                                                                                                   |
|                                                        |                 | Religious beliefs, witchcraft           | Whole plants  | Component part of the bouquets                                                                                 |
| POACEAE                                                |                 |                                         |               |                                                                                                                |
| <i>Cenchrus echinatus</i> L., 25887                    | Zacate criollo  | Forage                                  | Whole plant   | Dry                                                                                                            |
| <i>Zea mays</i> L., 25900                              | Maíz            | Forage                                  | Whole plant   | Dry                                                                                                            |
|                                                        |                 | Medicinal (digestive system), parasites | Flower styles | Boiled, drink the solution                                                                                     |
|                                                        |                 | Compost                                 | Whole plant   | Mixed with ripen fruits or fleshy stems                                                                        |
| POLYGONACEAE                                           |                 |                                         |               |                                                                                                                |
| <i>Antigonon leptopus</i> Hook. & Arn, 26005           | San Diego       | Ornamental                              | Whole plant   | Cultivated in private gardens                                                                                  |
| RESEDACEAE                                             |                 |                                         |               |                                                                                                                |
| <i>Reseda luteola</i> L., 26006                        | Resedad, gualda | Forage                                  | Whole plant   | Dry                                                                                                            |
| RHAMNACEAE                                             |                 |                                         |               |                                                                                                                |
| <i>Condalia hookeri</i> M.C.Johnst., 26017             | Brasil          | Timber                                  | Wood          | Dry                                                                                                            |
| <i>Karwinskia humboldtiana</i> (Schult.) Zucc., 26062  | Tullidora       | Ornamental                              | Whole plant   | Cultivated in private gardens                                                                                  |
|                                                        |                 | Medicinal                               | Fruits        | Macerated, the pulp is applied to the part where the splinters are buried, the wound is covered with a bandage |
| ROSACEAE                                               |                 |                                         |               |                                                                                                                |

| Scientific name                                               | Common name      | Uses (systems)                                                                                     | Part used                            | Method of use                                                                                                                          |
|---------------------------------------------------------------|------------------|----------------------------------------------------------------------------------------------------|--------------------------------------|----------------------------------------------------------------------------------------------------------------------------------------|
| <i>Fragaria vesca</i> L., 26063                               | Fresa            | Ornamental                                                                                         | Whole plant                          | Cultivated in private gardens                                                                                                          |
| <i>Purshia plicata</i> (D.Don) Henr., 26007                   | Rosa de Castilla | Medicinal (digestive system), upset stomach, inflammation of the stomach<br>Ornamental             | Leaves and branches<br>Whole plant   | Boiled, drink the solution<br>Planted in private gardens                                                                               |
| RUTACEAE                                                      |                  |                                                                                                    |                                      |                                                                                                                                        |
| <i>Casimiroa pringlei</i> (S.Watson) Engl., 25891             | Manguito         | Ornamental                                                                                         | Whole plant                          | Cultivated in private gardens                                                                                                          |
| <i>Helietta parvifolia</i> (A. Gray) Benth., 25799            | Barreta          | Timber<br>Medicinal (digestive system), stomach ache                                               | Wood<br>Leaves                       | Dry<br>Boiled, drink the solution                                                                                                      |
| SAPOTACEAE                                                    |                  |                                                                                                    |                                      |                                                                                                                                        |
| <i>Sideroxylon celastrinum</i> (Kunth) T.D. Penn., 25898      | Coma             | Ornamental<br>Food                                                                                 | Whole plant<br>Fruits                | Cultivated in private and public gardens<br>Raw                                                                                        |
| SCROPHULARIACEAE                                              |                  |                                                                                                    |                                      |                                                                                                                                        |
| <i>Leucophyllum frutescens</i> (Berland.) I.M. Johnst., 26008 | Cenizo           | Ornamental<br>Medicinal (endocrin system), hepatitis<br>Medicinal (digestive system), stomach ache | Whole plant<br>Whole plant<br>Leaves | Cultivated in private and public gardens<br>Boiled, drink the solution and take a bath with the solution<br>Boiled, drink the solution |
| SELAGINELLACEAE                                               |                  |                                                                                                    |                                      |                                                                                                                                        |
| <i>Selaginella pilifera</i> A. Braun, 26064                   | Flor de peña     | Ornamental                                                                                         | Whole plant                          | Cultivated in private gardens                                                                                                          |
| SIMAROUBACEAE                                                 |                  |                                                                                                    |                                      |                                                                                                                                        |

| Scientific name                                                                     | Common name    | Uses (systems)                                                                                     | Part used               | Method of use                                             |
|-------------------------------------------------------------------------------------|----------------|----------------------------------------------------------------------------------------------------|-------------------------|-----------------------------------------------------------|
| <i>Castelea erecta</i> var. <i>texana</i> (Torr. & A.Gray) Cronquist, 26015         | Bisbirinda     | Medicinal (digestive system), eliminate parasites (amoeba)                                         | Leaves                  | Boiled, drink the solution                                |
| SOLANACEAE                                                                          |                |                                                                                                    |                         |                                                           |
| <i>Capsicum annum</i> var. <i>glabriusculum</i> (Sunal) Heiser & Pickersgill, 25797 | Chile piquín   | Food (condiment)<br>Ornamental                                                                     | Fruit<br>Whole plant    | Raw or cooked<br>Cultivated in private gardens            |
|                                                                                     |                | Medicinal (immune system)                                                                          | Fruit                   | Raw                                                       |
|                                                                                     |                | Medicinal (respiratory system), eliminate phlegm                                                   | Fruit                   | Raw or boiled, drink the solution                         |
|                                                                                     |                | Cosmetic, fruit pulp applied directly to the hair to give it shine and prevent it from falling out | Fruit                   | Boiled                                                    |
| <i>Capsicum annuum</i> L. var. <i>annuum</i> , 26072                                | Chile cascabel | Food (condiment)                                                                                   | Fruit                   | Raw or cooked                                             |
| <i>Capsicum annuum</i> L. var. <i>annuum</i> , 26073                                | Chile serrano  | Food (condiment)<br>Medicinal (immune system)                                                      | Fruit<br>Fruit          | Raw or cooked<br>Raw                                      |
| <i>Capsicum annuum</i> L. var. <i>annuum</i> , 26074                                | Chile de arbol | Food (condiment)                                                                                   | Fruit                   | Raw or cooked                                             |
| <i>Capsicum annuum</i> L. var. <i>annuum</i> , 26075                                | Chile guajillo | Food (condiment)                                                                                   | Fruit                   | Raw or cooked                                             |
| <i>Capsicum annuum</i> L. var. <i>annuum</i> , 26076                                | Chile jalapeño | Food (condiment)<br>Medicinal (immune system)<br>Medicinal (respiratory system), eliminate phlegm  | Fruit<br>Fruit<br>Fruit | Raw or cooked<br>Raw<br>Raw or boiled, drink the solution |
| <i>Capsicum annuum</i> L. var. <i>annuum</i> , 26077                                | Chile chilaca  | Food                                                                                               | Fruit                   | Raw or cooked                                             |
| <i>Capsicum annum</i> L. var. <i>annuum</i> , 26078                                 | Chile morrón   | Food                                                                                               | Fruit                   | Raw or cooked                                             |

| Scientific name                                           | Common name           | Uses (systems)                                                                                                                                      | Part used               | Method of use                              |
|-----------------------------------------------------------|-----------------------|-----------------------------------------------------------------------------------------------------------------------------------------------------|-------------------------|--------------------------------------------|
| <i>Capsicum chinense</i> Jacq., 25798                     | Chile habanero        | Food (condiment)<br>Medicinal (immune system)<br>Cosmetic, fruit pulp applied directly to the hair to give it shine and prevent it from falling out | Fruit<br>Fruit<br>Fruit | Raw or cooked<br>Raw<br>Boiled             |
| <i>Datura stramonium</i> L., 26009                        | Toloache, floripondio | Ornamental                                                                                                                                          | Whole plant             | Cultivated in private gardens              |
| TURNERACEAE                                               |                       |                                                                                                                                                     |                         |                                            |
| <i>Turnera diffusa</i> Willd. ex Schult., 26011           | Hierba venado         | de Medicinal (digestive system), digestion<br>Forage                                                                                                | Leaves<br>Whole plant   | Boiled, drink the solution<br>Dry or fresh |
| VERBENACEAE                                               |                       |                                                                                                                                                     |                         |                                            |
| <i>Glandularia bipinnatifida</i> Nutt., 26014             | Alfombrilla           | Ornamental                                                                                                                                          | Whole plant             | Cultivated in private gardens              |
| <i>Lantana camara</i> L., 25793                           | Lantana               | Ornamental                                                                                                                                          | Whole plant             | Cultivated in private gardens              |
| <i>Lippia graveolens</i> Kunth, 25895                     | Orégano               | Medicinal (respiratory system), cough, cold, chest pain                                                                                             | Leaves                  | Boiled, drink the solution                 |
| VITACEAE                                                  |                       |                                                                                                                                                     |                         |                                            |
| <i>Cissus incisa</i> (Nutt.) Des Moul. ex S.Watson, 26068 | Hierba del buey       | Medicinal (digestive system), improve digestion                                                                                                     | Leaves                  | Boiled, drink the solution                 |
| ZYGOPHYLLACEAE                                            |                       |                                                                                                                                                     |                         |                                            |
| <i>Guaiacum angustifolium</i> Engelm., 25896              | Guayacán              | Medicinal (skin and subcutaneous system)                                                                                                            | Leaves and root         | Boiled, use as poultice                    |



| Scientific name                                                         | Common name | Uses (systems)                                  | Part used | Method of use            |
|-------------------------------------------------------------------------|-------------|-------------------------------------------------|-----------|--------------------------|
| <i>Larrea tridentata</i> (Sessé & Moc. <i>ex</i> DC.)<br>Coville, 25794 | Gobernadora | Medicinal (genito-<br>urinary system), diuretic | Leaves    | Boil, drink the infusion |
